# Supplementary material
Source: publisher figshare collection journal article supplement (https://acs.figshare.com/ndownloader/files/5192152)
Supplement: Supplementary file 1 [file 5192152]

**Supporting Information for**

**Facile Ring Opening of Iron(III) and Iron (II) Complexes of *meso*-Amino-octaethylporphyrin by Dioxygen.**

Sankar Prasad Rath, Heather Kalish, Lechoslaw Latos-Grazynski, Marilyn M. Olmstead, and

Alan L. Balch

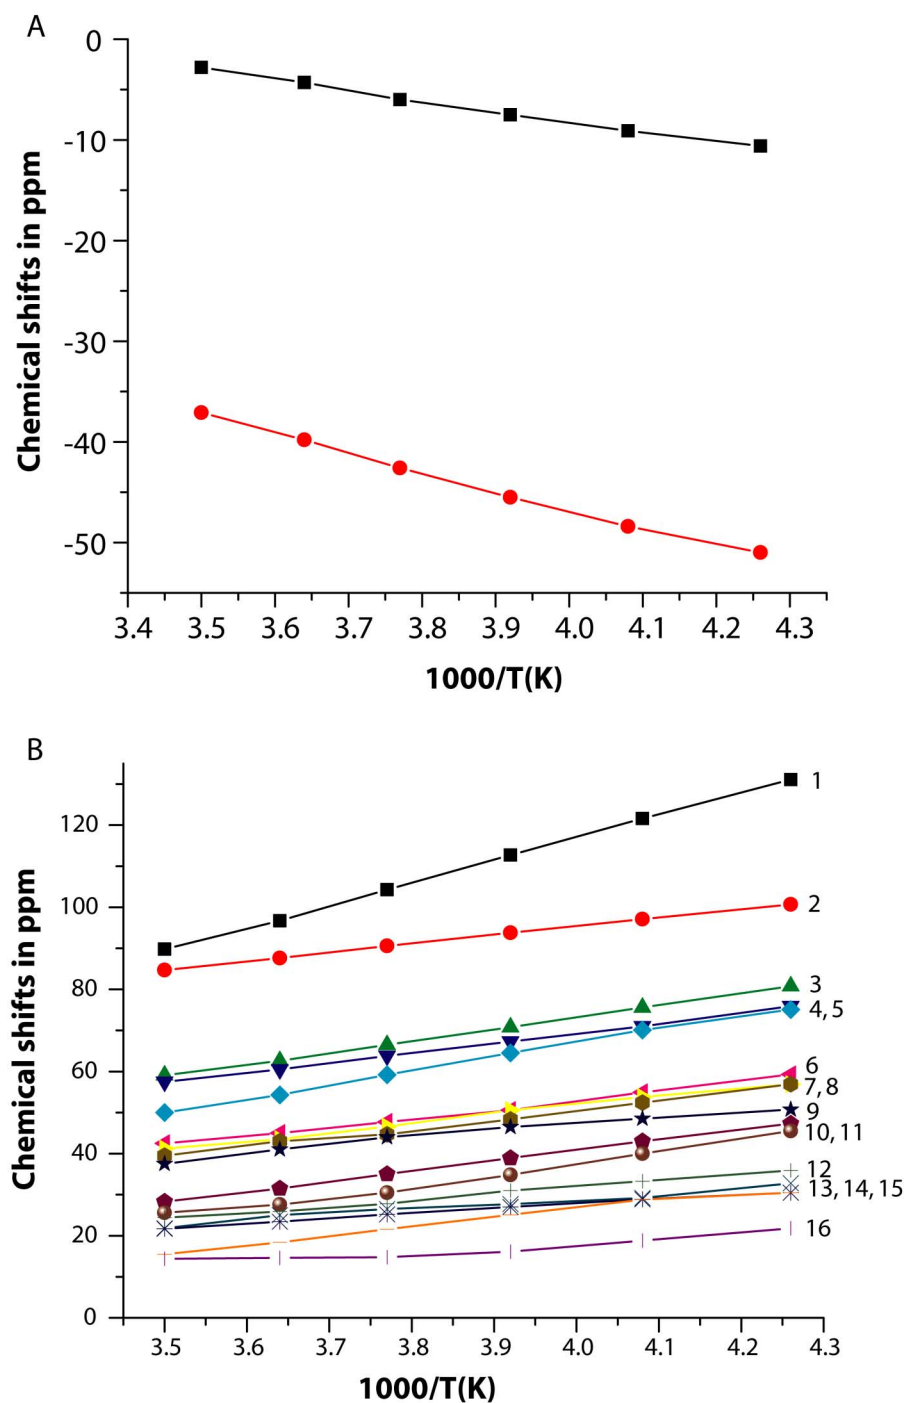

**Figure S1.** A plot of chemical shift versus  $1/T$  for the open-chain tetrapyrrole complex **3**. Meso resonances are plotted in the top part while the methylene resonances are shown in the lower portion.
